# Supplementary material for: ABS-SmartPriority: An Agent-Based Simulator of Strategies for Managing Self-Reported Priorities in Smart Cities
Source: Hindawi journal article supplement (doi:10.1155/2017/7254181), 2017-01-01
Supplement: f1 [file 7254181.f1.zip]

Archive with 12 entries (9 files):
- abssmartpriority/
- abssmartpriority/.DS_Store
- __MACOSX/
- __MACOSX/abssmartpriority/
- __MACOSX/abssmartpriority/._.DS_Store
- abssmartpriority/README.html
- __MACOSX/abssmartpriority/._README.html
- abssmartpriority/SmartPriority.zip
- __MACOSX/abssmartpriority/._SmartPriority.zip
- abssmartpriority/style.css
- __MACOSX/abssmartpriority/._style.css
- __MACOSX/._abssmartpriority
