# Supplementary material for: ABS-SmartPriority: An Agent-Based Simulator of Strategies for Managing Self-Reported Priorities in Smart Cities
Source: Hindawi journal article supplement (doi:10.1155/2017/7254181), 2017-01-01
Supplement: f1 [file 7254181.f1.zip › abssmartpriority/README.html]

 ABS-SmartPriority 


# ABS-SmartPriority: An agent-based simulator of strategies for managing self-reported priorities in smart cities


Presentation

Authors

Download

## Presentation

This web includes an agent-based framework for simulating strategies for managing priorities self-reported by citizens or their apps in the resquests of services of smart cities. This framework was programmed with the Unity engine, version 5.5.1. In this framework, developers can define new strategies by extending the PriorityAgent and implementing the method "Normalize". One can observe an example in the "SmartPriorityAgegnt" class. Developers can also define new behavoirs of user agents by extending either "UserAgent" or "StochasticUserAgent" classes. Examples of definition of user agents are the "SelfishUserAgent" or the "StochasticUserAgent" itself.

Other researchers can use this tool for their research as long as they properly cite the work of the authors.

The authors welcome proposals about collaborations concerning this framework or other matters.

## Authors

The authors of this work follow:

- Iván García-Magariño (Corresponding author, you can explore his  website  to know more about his works).
- Raquel Lacuesta

## Download the ABS-SmartPriority framework

The source code of this framework can be downloaded from the following link: 

- ABS-SmartPriority:  SmartPriority.zip

It is worth mentioning that the developer needs to open the project folder with Unity 5.5.1 to compile and run this framework. The Unity engine is available from its website Unity Dowloads .
